# Supplementary material for: Distance-dependent fluorescence of tris(bipyridine)ruthenium(ii) on supported plasmonic gold nanoparticle ensembles
Source: Royal Society of Chemistry journal article supplement (doi:10.1039/c4nr04237a), 2014-01-01
Supplement: c4nr04237a1.pdf [file c4nr04237a1.pdf]

## Distance-Dependent Fluorescence of Tris(bipyridine)ruthenium(II) on Supported Plasmonic Gold Nanoparticle Ensembles

Ofer Kedem,<sup>†</sup> Wendel Wohlleben,<sup>‡</sup> Israel Rubinstein<sup>†</sup>

<sup>†</sup>*Dept. of Materials and Interfaces, Weizmann Institute of Science, Rehovot 7610001, Israel*

<sup>‡</sup>*BASF SE, Advanced Materials Research, Dept. of Material Physics, 67056 Ludwigshafen, Germany*

### Supporting Information

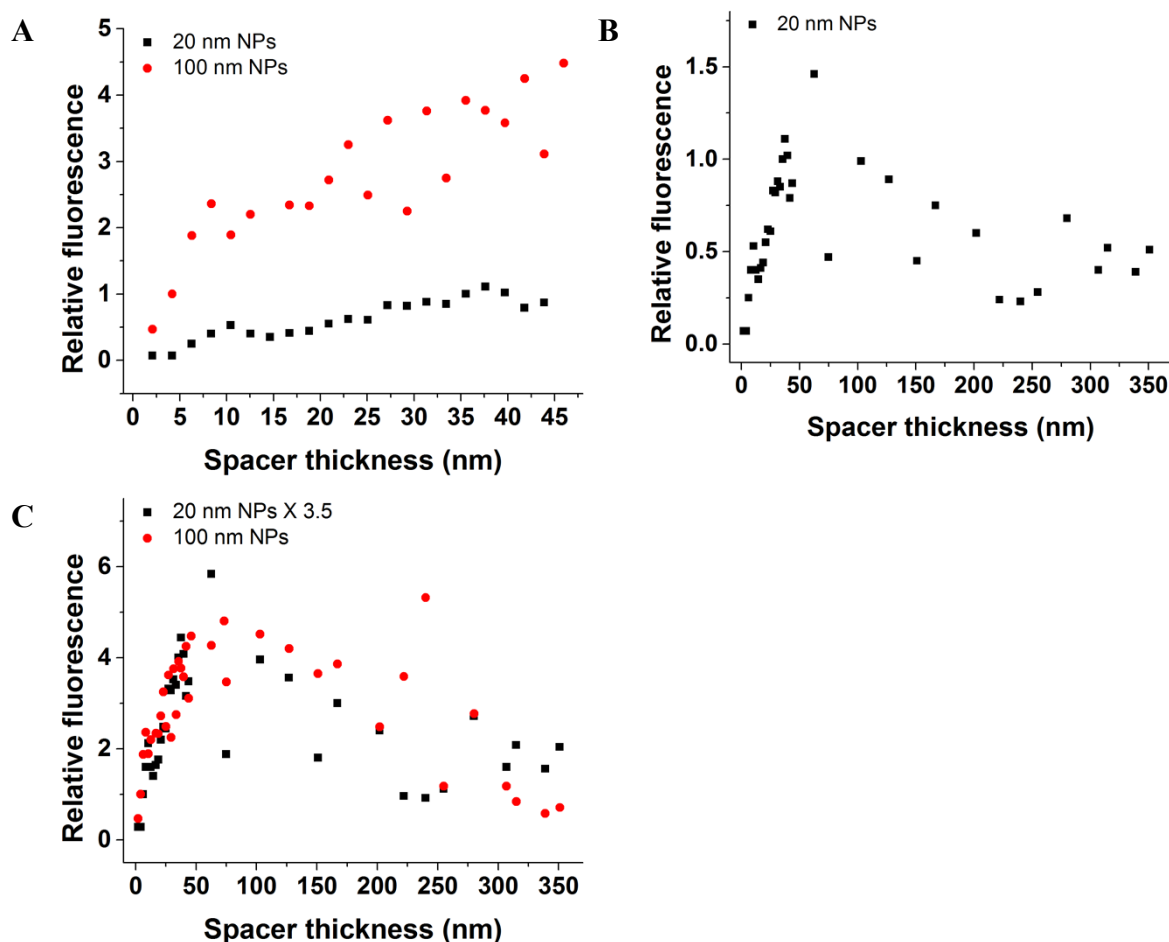

**Figure S1.** Relative fluorescence intensities of a  $\text{Ru}(\text{bpy})_3^{2+}$  monolayer on different spacer thicknesses, on 20 nm and 100 nm Au NPs (indicated) films. (A) Relative fluorescence intensities up to 50 nm; (B) Relative fluorescence intensities for 20 nm NPs; (C) Relative fluorescence intensities for both NP types, with the intensity for 20 nm NPs multiplied by a factor of 3.5, to better compare the distance dependence profile.

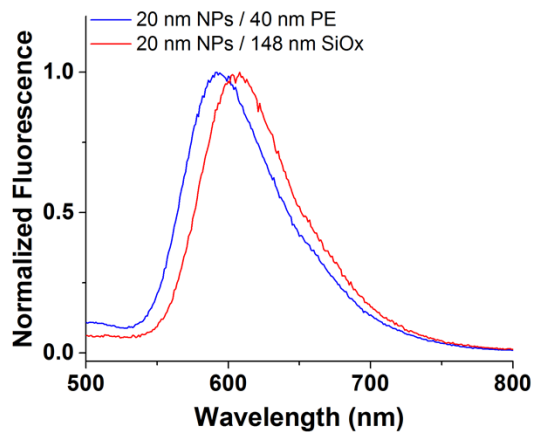

Figure S2. Normalized emission spectra for 20 nm NPs samples, on two different spacer thicknesses.

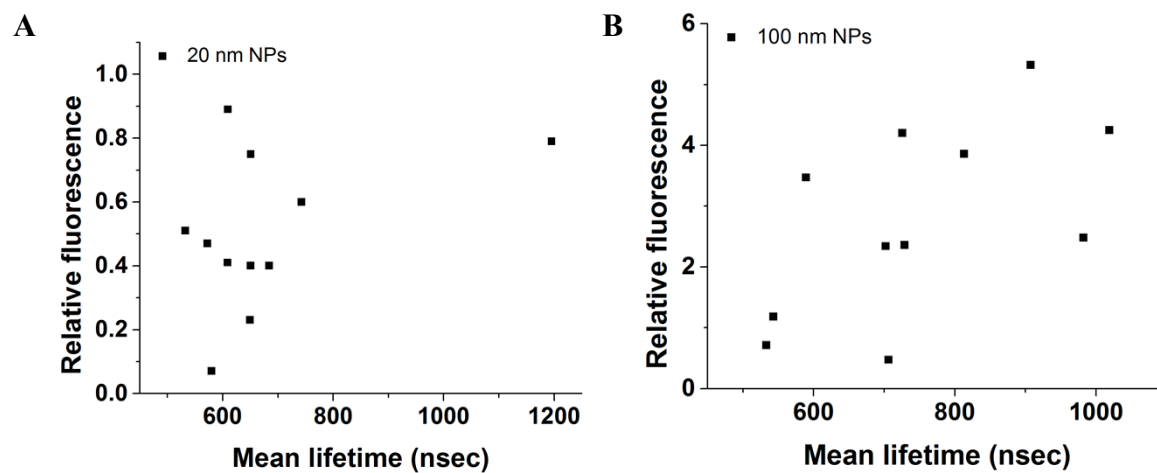

Figure S3. Relative fluorescence intensity as a function of mean fluorescence lifetime, for (A) 20 nm and (B) 100 nm NPs.
